# Supplementary material for: Predisposing Risk Factors for Functional Limb Weakness: A Case-Control Study
Source: Atypon-hosted journal article supplement (doi:10.1176/appi.neuropsych.19050109), 2019-08-30
Supplement: appi.neuropsych.19050109.ds001.pdf [file appi.neuropsych.19050109.ds001.pdf]

**Supplementary Figure S1. Results from the Childhood Trauma Questionnaire categorized in to severe, moderate, low and none in cases with functional limb weakness (n=94) and controls (n=75)**

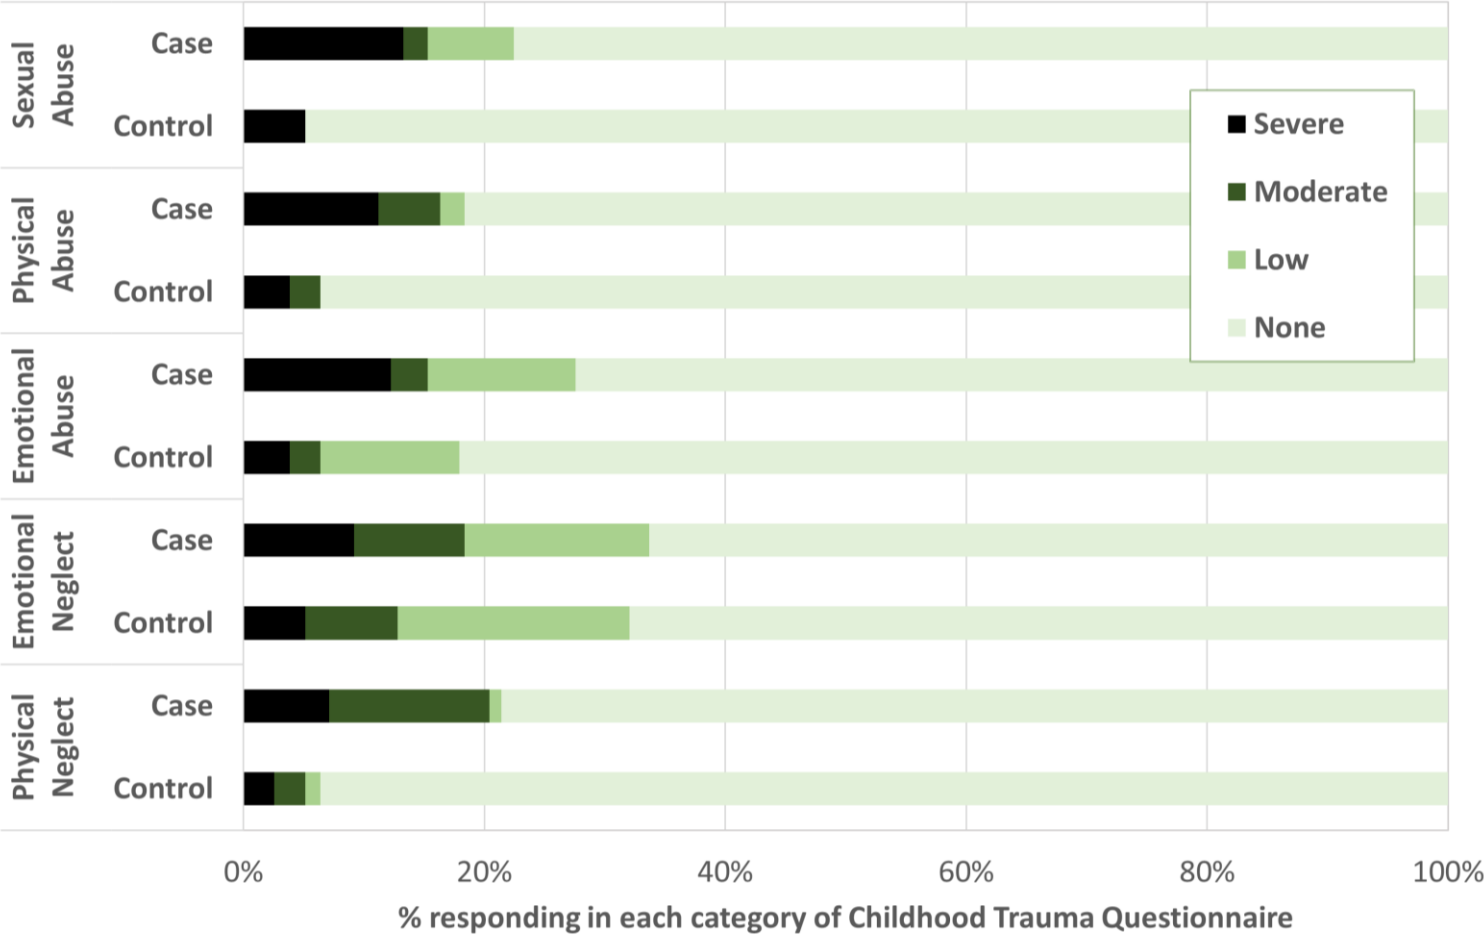

**Supplementary Table S1. Childhood experience of abuse and neglect: Median values from childhood trauma questionnaire data.**

Although medians are identically low, the significant results can be explained by the distribution of the results at the upper end of the scale (see Table 2 in main article).

|                                                                  | <b>Functional limb weakness (n=107)</b> |         | <b>Neurological and healthy controls (n=85)</b> |         | <b>Significance (Mann-Whitney test)</b> |
|------------------------------------------------------------------|-----------------------------------------|---------|-------------------------------------------------|---------|-----------------------------------------|
| <b>Childhood Trauma Questionnaire</b>                            |                                         |         |                                                 |         |                                         |
| <b>(median scores out of 25 (IQR). Five is lowest possible)*</b> |                                         |         |                                                 |         |                                         |
| Sexual Abuse                                                     | 5                                       | (5-5)   | 5                                               | (5-5)   | P=0.003                                 |
| Physical Abuse                                                   | 5                                       | (5-7.2) | 5                                               | (5-5)   | P=0.009                                 |
| Emotional Abuse                                                  | 5                                       | (5-10)  | 5                                               | (5-7.5) | p=0.50                                  |
| Emotional Neglect                                                | 7                                       | (5-11)  | 7                                               | (5-11)  | P=0.89                                  |
| Physical Neglect                                                 | 5                                       | (5-7.2) | 5                                               | (5-5)   | P=0.01                                  |

**Supplementary Table S2. The data from this study in context with other larger studies in functional motor disorders and a systematic review of all functional neurological disorders {18}**

| <b>First author</b>                       | <b>This study</b>                                                        | <b>Binzer{2}</b> | <b>Kranick{5}</b>            | <b>O'Connell{4}</b>             | <b>Ludwig- meta analysis{18}</b>      |
|-------------------------------------------|--------------------------------------------------------------------------|------------------|------------------------------|---------------------------------|---------------------------------------|
| Setting                                   | Neurology                                                                | Neurology        | Neurology                    | Psychiatry                      | Various                               |
| Number of functional motor disorder cases | 107                                                                      | 30               | 64                           | 322**                           | 1405 – All FND (mostly seizures)      |
| Duration                                  | 9 months                                                                 | Acute            | 6 years                      | 14 years                        |                                       |
| Number and nature of controls             | 75* - neuro/ healthy                                                     | Healthy          | 78 – neuro/healthy           | 644 - psychiatric               | 1802 – various                        |
| Mean age (yrs.) – cases vs controls       | 38 vs 38                                                                 | 39 vs 34         | 45 vs 49 vs 49               | 46 vs 48                        | N/A                                   |
| % female                                  | 74%                                                                      | 60%              | 72%                          | 74%                             | N/A                                   |
| <b>Interview / Dichotomous data</b>       |                                                                          |                  |                              |                                 |                                       |
| Child sexual abuse                        | 13% vs 1%                                                                | 3% vs 0%         | N/A                          | 20% vs 22%,<br>OR 0.9 (0.6-1.3) | 24% vs 10%,                           |
| Child physical abuse                      | 11% vs 4%                                                                | N/A              | N/A                          | 23% vs 22%,<br>OR 1.0 (0.7-1.5) | 30% vs 12%                            |
| Adult sexual abuse                        | 19% vs 6%                                                                |                  |                              | 27% vs 21%,                     | OR 2.8 (2.0-13.9)                     |
| Adult Physical Abuse                      |                                                                          | N/A              | N/A                          | OR 1.4 (1.0-2.0)                | OR 2.9 (1.6-5.4)                      |
| <b>Questionnaire / All Data</b>           | Childhood Trauma Questionnaire (median (this study), mean {5} – p value) |                  |                              |                                 | Odds Ratios (95% Confidence Interval) |
| Childhood Sexual Abuse                    | 5 vs 5 – 0.005                                                           | N/A              | 6.7 vs 6.0 vs 6.0– 0.4       | N/A                             | 3.3 (2.4-4.8)                         |
| Childhood Physical Abuse                  | 5 vs 5 - <0.001                                                          | N/A              | 7.7 vs 6.4 vs 6.1 – 0.09     | N/A                             | 3.9 (2.2-7.2)                         |
| Childhood Emotional Neglect               | 7 vs 7 – NS                                                              | N/A              | 7.5 vs 6.4 vs 8.1 – 0.1      | N/A                             | 5.6 (2.4-13.1)                        |
| Childhood Emotional Abuse                 | 5 vs 5 – NS                                                              | N/A              | 10.4 vs 6.9 vs 7.5 - <0.0001 | N/A                             | N/A                                   |
| Childhood Physical Neglect                | 5 vs 5 – 0.05                                                            | N/A              | 11.8 vs 8.2 vs 6.6 -<0.0001  | N/A                             | N/A                                   |

\*n=85 for interview data; \*\* variety of functional motor disorders, 50% weakness
